# Supplementary material for: Subretinal Implantation of Human Primary RPE Cells Cultured on Nanofibrous Membranes in Minipigs
Source: MDPI journal article supplement (doi:10.3390/biomedicines10030669), 2022-03-14
Supplement: s1 [file s1]

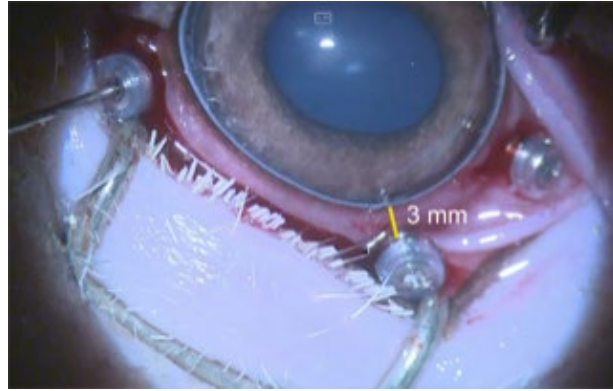

**Supplementary Figure S1. Position of the 23-gauge (G) trocars, which were inserted 2.5-3 mm from the limbus.**

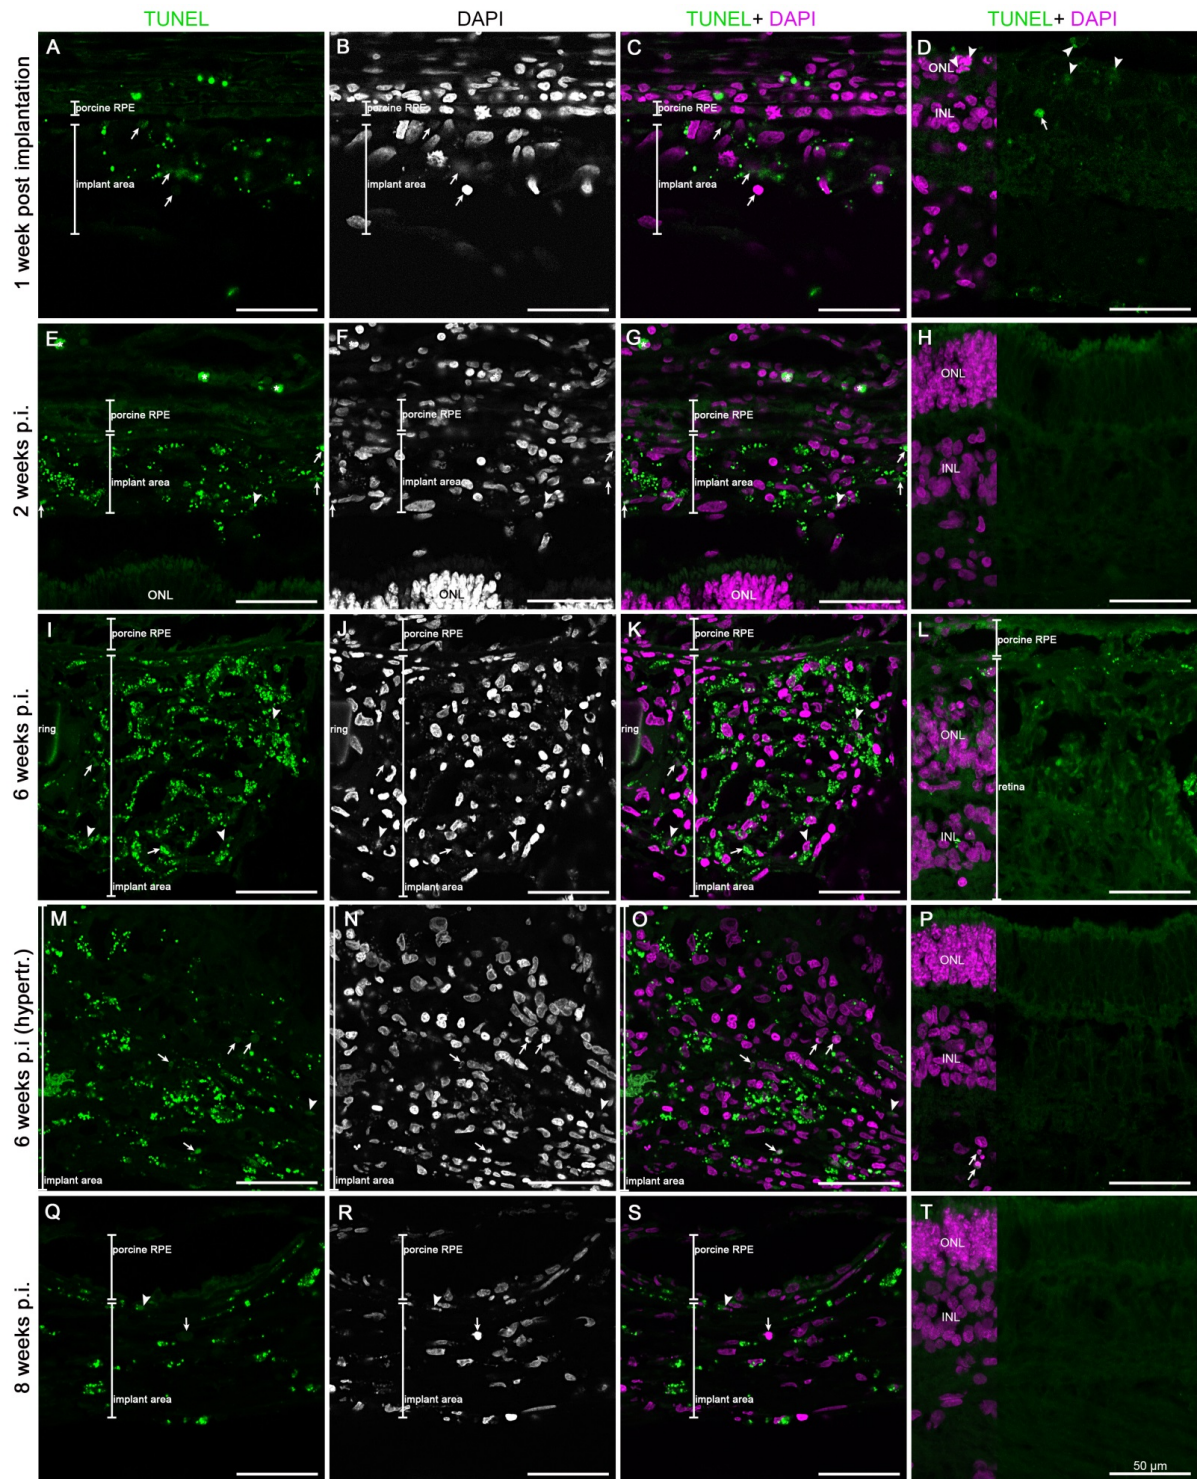

Supplementary Figure S2. TUNEL assay in the implant area and underlying neuroretina (D, H, L, P, T) followed up to 8 weeks.
